# Supplementary material
Source: Springer Nature journal article supplement (https://www.springermedizin.de/resource/supplementary/12876_2009_448_MOESM3_ESM.pdf/9437030)
Supplement: MOESM3 [file 9437030]

Vector  
number

c.-3275  
c.-3152  
c.-2951  
c.-2743  
c.-2737  
c.-2726  
c.-2424(AT)<sup>n</sup>  
c.-2473  
c.-1352  
c.-689  
c.-364  
TATA box

Name of expression vector

|     |   |                     |                   |     |                                    |
|-----|---|---------------------|-------------------|-----|------------------------------------|
| (1) | T | G A T T G 3 T A A C | (TA) <sup>6</sup> | Luc | T-w-(TA) <sup>6</sup> _wild        |
| (2) | G | A G C C A 8 G C C T | (TA) <sup>7</sup> | Luc | G-m-(TA) <sup>7</sup> _Gilbert     |
| (3) | T | G A T T G 3 T A A C | (TA) <sup>7</sup> | Luc | T-w-(TA) <sup>7</sup> _combination |
| (4) | G | A G C C A 8 G C C T | (TA) <sup>6</sup> | Luc | G-m-(TA) <sup>6</sup> _combination |
| (5) | G | G A T T G 3 T A A C | (TA) <sup>6</sup> | Luc | G-w-(TA) <sup>6</sup> _combination |
| (6) | T | A G C C A 8 G C C T | (TA) <sup>7</sup> | Luc | T-m-(TA) <sup>7</sup> _combination |
| (7) | G | G A T T G 3 T A A C | (TA) <sup>7</sup> | Luc | G-w-(TA) <sup>7</sup> _combination |
| (8) | T | A G C C A 8 G C C T | (TA) <sup>6</sup> | Luc | T-m-(TA) <sup>6</sup> _combination |
